# Supplementary material for: Development and Validation of an XGBoost-Algorithm-Powered Survival Model for Predicting In-Hospital Mortality Based on 545,388 Isolated Severe Traumatic Brain Injury Patients from the TQIP Database
Source: MDPI journal article supplement (doi:10.3390/jpm13091401), 2023-09-19
Supplement: s1 [file s1]

## Supplemental Materials

**Table S1.** Comparison of the features between the training and test datasets.

| V1                                                      | level            | Overall<br>(n = 545388) | Training<br>dataset<br>(n = 436421) | Test dataset<br>(n = 108967) | <i>p</i> -value |
|---------------------------------------------------------|------------------|-------------------------|-------------------------------------|------------------------------|-----------------|
| In-hospital mortality (%)                               |                  | 46789 (8.6)             | 37402 (8.6)                         | 9387 (8.6)                   | 0.644           |
| Length of hospital stay (median [IQR])                  |                  | 4.00 [2.00,<br>7.00]    | 4.00 [2.00,<br>7.00]                | 4.00 [2.00,<br>7.00]         | 0.258           |
| Age (median [IQR])                                      |                  | 67.00 [50.00,<br>79.00] | 67.00<br>[50.00,<br>79.00]          | 68.00 [50.00,<br>79.00]      | 0.350           |
| Sex (%)                                                 | Female           | 207353 (38.0)           | 165781<br>(38.0)                    | 41572 (38.2)                 | 0.216           |
|                                                         | Male             | 337300 (61.8)           | 270036<br>(61.9)                    | 67264 (61.7)                 |                 |
| Head AIS (%)                                            | 3                | 292834 (53.7)           | 233937<br>(53.6)                    | 58897 (54.1)                 | 0.030           |
|                                                         | 4                | 144015 (26.4)           | 115454<br>(26.5)                    | 28561 (26.2)                 |                 |
|                                                         | 5                | 108539 (19.9)           | 87030 (19.9)                        | 21509 (19.7)                 |                 |
| GCS (median [IQR])                                      |                  | 15.00 [14.00,<br>15.00] | 15.00<br>[14.00,<br>15.00]          | 15.00 [14.00,<br>15.00]      | 0.679           |
| Epidural hematoma (%)                                   |                  | 24389 (4.5)             | 19564 (4.5)                         | 4825 (4.4)                   | 0.438           |
| Traumatic subdural hematoma (%)                         |                  | 389737 (71.5)           | 311858<br>(71.5)                    | 77879 (71.5)                 | 0.939           |
| Traumatic subarachnoid hemorrhage (%)                   |                  | 176420 (32.3)           | 141233<br>(32.4)                    | 35187 (32.3)                 | 0.660           |
| Cerebral contusion (%)                                  |                  | 143258 (26.3)           | 114464<br>(26.2)                    | 28794 (26.4)                 | 0.188           |
| Diffuse axonal injury (%)                               |                  | 6589 (1.2)              | 5347 (1.2)                          | 1242 (1.1)                   | 0.022           |
| Other intracranial injury (%)                           |                  | 17842 (3.3)             | 14303 (3.3)                         | 3539 (3.2)                   | 0.630           |
| Neurosurgical intervention (%)                          | Missing          | 343 (0.1)               | 276 (0.1)                           | 67 (0.1)                     | 0.306           |
|                                                         | After 24 hours   | 12542 (2.3)             | 10019 (2.3)                         | 2523 (2.3)                   |                 |
|                                                         | Within 24 hours  | 40467 (7.4)             | 32526 (7.5)                         | 7941 (7.3)                   |                 |
|                                                         | None             | 492036 (90.2)           | 393600<br>(90.2)                    | 98436 (90.3)                 |                 |
| Volume PRBC transfused within 4 hours<br>(median [IQR]) |                  | 0.00 [0.00,<br>0.00]    | 0.00 [0.00,<br>0.00]                | 0.00 [0.00,<br>0.00]         | 0.944           |
| Race (%)                                                |                  |                         |                                     |                              | 0.083           |
|                                                         | White            | 420624 (77.1)           | 336451<br>(77.1)                    | 84173 (77.2)                 |                 |
|                                                         | Black            | 51149 (9.4)             | 41074 (9.4)                         | 10075 (9.3)                  |                 |
|                                                         | Asian            | 16420 (3.0)             | 13099 (3.0)                         | 3321 (3.0)                   |                 |
|                                                         | American Indian  | 5049 (0.9)              | 4115 (0.9)                          | 934 (0.9)                    |                 |
|                                                         | Pacific islander | 1554 (0.3)              | 1253 (0.3)                          | 301 (0.3)                    |                 |
|                                                         | Other            | 38737 (7.1)             | 30944 (7.1)                         | 7793 (7.2)                   |                 |
|                                                         | Missing          | 7124 (1.3)              | 5704 (1.3)                          | 1420 (1.3)                   |                 |

|                                                 |                              |                      |                      |                      |       |
|-------------------------------------------------|------------------------------|----------------------|----------------------|----------------------|-------|
| Anticoagulant therapy (%)                       |                              | 2960 (0.5)           | 2374 (0.5)           | 586 (0.5)            | 0.690 |
| History of myocardial infarction (%)            |                              | 9232 (1.7)           | 7328 (1.7)           | 1904 (1.7)           | 0.122 |
| Congestive heart failure (%)                    |                              | 32820 (6.0)          | 26254 (6.0)          | 6566 (6.0)           | 0.908 |
| Coagulopathy (%)                                |                              | 38321 (7.0)          | 30639 (7.0)          | 7682 (7.0)           | 0.740 |
| Alcohol use disorder (%)                        |                              | 59411 (10.9)         | 47533 (10.9)         | 11878 (10.9)         | 0.936 |
| Dementia (%)                                    |                              | 48290 (8.9)          | 38635 (8.9)          | 9655 (8.9)           | 0.940 |
| Disseminated cancer (%)                         |                              | 7085 (1.3)           | 5628 (1.3)           | 1457 (1.3)           | 0.221 |
| Cerebrovascular disease (%)                     |                              | 30908 (5.7)          | 24710 (5.7)          | 6198 (5.7)           | 0.745 |
| Diabetes mellitus (%)                           |                              | 112404 (20.6)        | 89928 (20.6)         | 22476 (20.6)         | 0.884 |
| Chronic renal failure (%)                       |                              | 14047 (2.6)          | 11251 (2.6)          | 2796 (2.6)           | 0.830 |
| Currently receiving chemotherapy for cancer (%) |                              | 4724 (0.9)           | 3767 (0.9)           | 957 (0.9)            | 0.644 |
| History of peripheral vascular disease (%)      |                              | 6373 (1.2)           | 5085 (1.2)           | 1288 (1.2)           | 0.655 |
| Chronic obstructive pulmonary disease (%)       |                              | 41545 (7.6)          | 33154 (7.6)          | 8391 (7.7)           | 0.251 |
| Drug use disorder (%)                           |                              | 26198 (4.8)          | 20971 (4.8)          | 5227 (4.8)           | 0.914 |
| Major psychiatric illness (%)                   |                              | 59759 (11.0)         | 47889 (11.0)         | 11870 (10.9)         | 0.453 |
| Advanced directive limiting care (%)            |                              | 28711 (5.3)          | 22983 (5.3)          | 5728 (5.3)           | 0.905 |
| Cirrhosis (%)                                   |                              | 9448 (1.7)           | 7583 (1.7)           | 1865 (1.7)           | 0.565 |
| Current smoker (%)                              |                              | 83507 (15.3)         | 66668 (15.3)         | 16839 (15.5)         | 0.147 |
| Hypotension (%)                                 |                              | 6667 (1.2)           | 5317 (1.2)           | 1350 (1.2)           | 0.297 |
| Tachycardia (%)                                 |                              | 92143 (16.9)         | 73595 (16.9)         | 18548 (17.0)         | 0.454 |
| Shock index (median [IQR])                      |                              | 0.57 [0.47, 0.69]    | 0.57 [0.47, 0.69]    | 0.57 [0.47, 0.69]    | 0.472 |
| Hospital teaching status (%)                    | Missing                      | 2086 (0.4)           | 1660 (0.4)           | 426 (0.4)            | 0.549 |
|                                                 | Community                    | 214614 (39.4)        | 171639 (39.3)        | 42975 (39.4)         |       |
|                                                 | Non-Teaching                 | 95017 (17.4)         | 75941 (17.4)         | 19076 (17.5)         |       |
|                                                 | University                   | 233671 (42.8)        | 187181 (42.9)        | 46490 (42.7)         |       |
| Payment method (%)                              | Missing                      | 15796 (2.9)          | 12631 (2.9)          | 3165 (2.9)           | 0.997 |
|                                                 | Medicare or Medicaid         | 322915 (59.2)        | 258377 (59.2)        | 64538 (59.2)         |       |
|                                                 | Not Billed (for any reason)  | 1861 (0.3)           | 1481 (0.3)           | 380 (0.3)            |       |
|                                                 | Other                        | 12092 (2.2)          | 9674 (2.2)           | 2418 (2.2)           |       |
|                                                 | Other Government Insurance   | 12697 (2.3)          | 10141 (2.3)          | 2556 (2.3)           |       |
|                                                 | Private/Commercial Insurance | 136940 (25.1)        | 109633 (25.1)        | 27307 (25.1)         |       |
|                                                 | Self-Pay                     | 43087 (7.9)          | 34484 (7.9)          | 8603 (7.9)           |       |
| Oxygen saturation (median [IQR])                |                              | 98.00 [96.00, 99.00] | 98.00 [96.00, 99.00] | 98.00 [96.00, 99.00] | 0.845 |
| Respiratory rate (median [IQR])                 |                              | 18.00 [16.00, 20.00] | 18.00 [16.00, 20.00] | 18.00 [16.00, 20.00] | 0.049 |

|                                     |   |                      |                      |                      |       |
|-------------------------------------|---|----------------------|----------------------|----------------------|-------|
| Temperature (median [IQR])          |   | 36.70 [36.40, 36.90] | 36.70 [36.40, 36.90] | 36.70 [36.40, 36.90] | 0.571 |
| Injury present: face (%)            |   | 150765 (27.6)        | 120594 (27.6)        | 30171 (27.7)         | 0.716 |
| Injury present: neck (%)            |   | 3450 (0.6)           | 2739 (0.6)           | 711 (0.7)            | 0.365 |
| Injury present: spine (%)           |   | 6111 (1.1)           | 4802 (1.1)           | 1309 (1.2)           | 0.005 |
| Injury present: thorax (%)          |   | 21000 (3.9)          | 16732 (3.8)          | 4268 (3.9)           | 0.207 |
| Injury present: abdomen (%)         |   | 12937 (2.4)          | 10302 (2.4)          | 2635 (2.4)           | 0.268 |
| Injury present: upper extremity (%) |   | 71678 (13.1)         | 57382 (13.1)         | 14296 (13.1)         | 0.806 |
| Injury present: lower_extremity (%) |   | 55576 (10.2)         | 44397 (10.2)         | 11179 (10.3)         | 0.404 |
| Injury present: external (%)        | 1 | 22592 (4.1)          | 18065 ( .1)          | 4527 (4.2)           | 0.829 |

Student t-tests were used for normally distributed variables, Mann-Whitney U tests for non-normally distributed variables, and chi-squared tests for categorical variables.

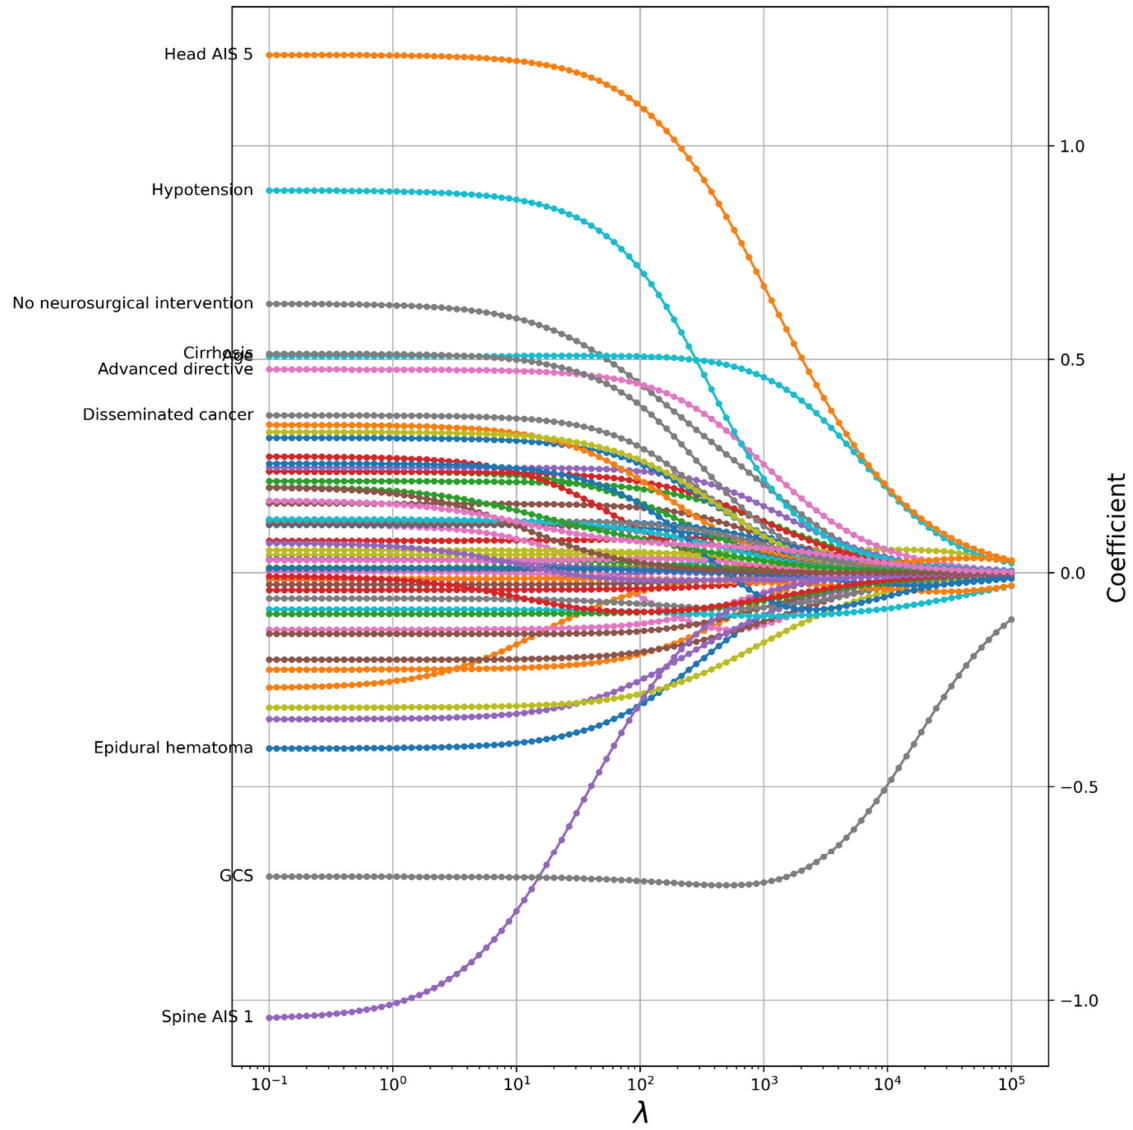

**Figure S1.** Coefficients of the predictors from the Ridge Cox regression analysis with varying L2 penalty (top 10 predictors were labeled).

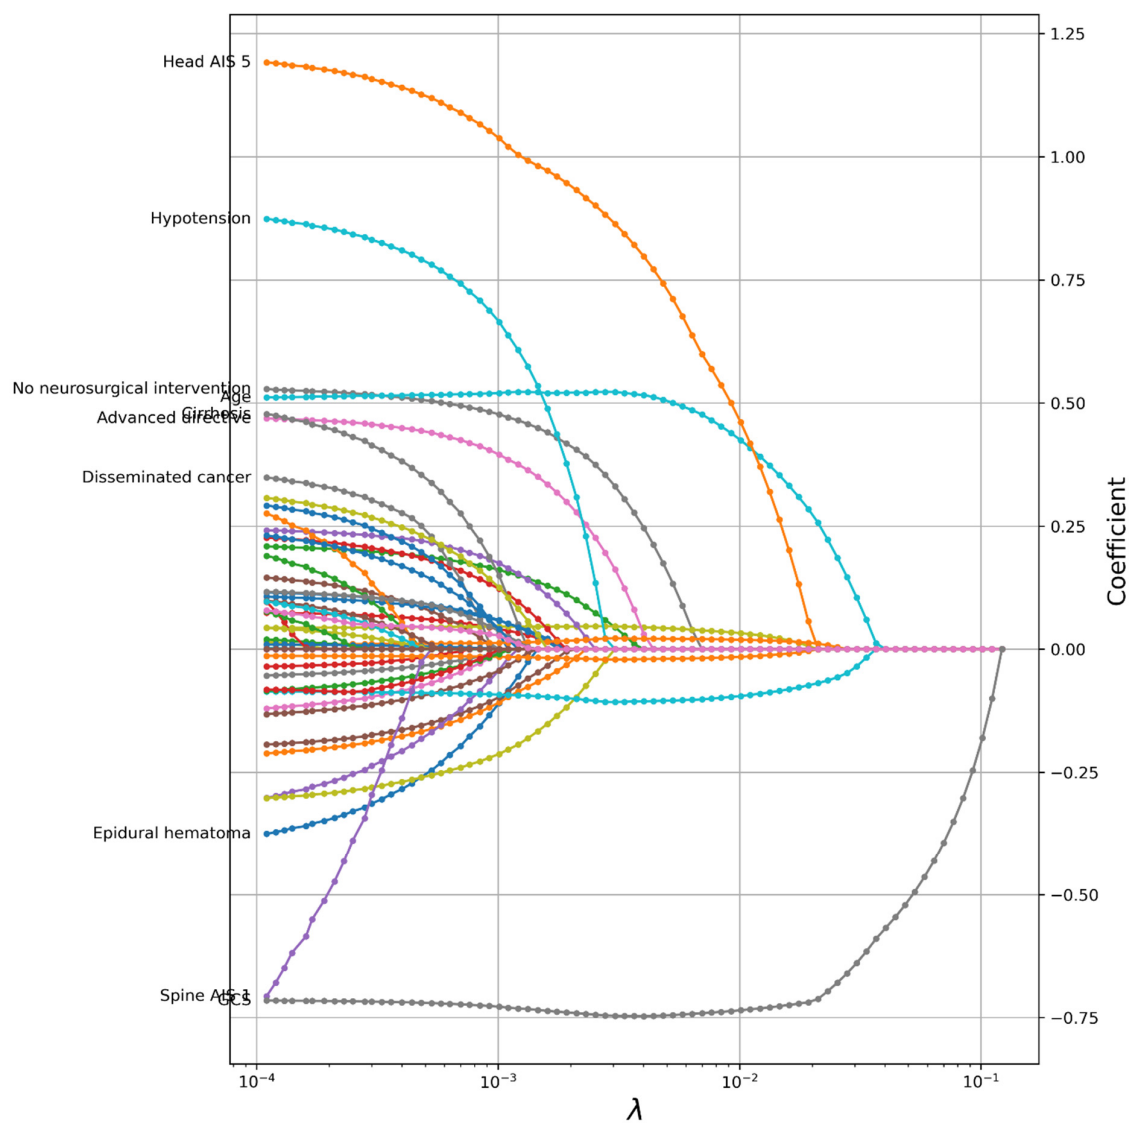

**Figure S2.** Coefficients of the predictors from the LASSO Cox regression analysis with varying L1 penalty (top 10 predictors were labeled).

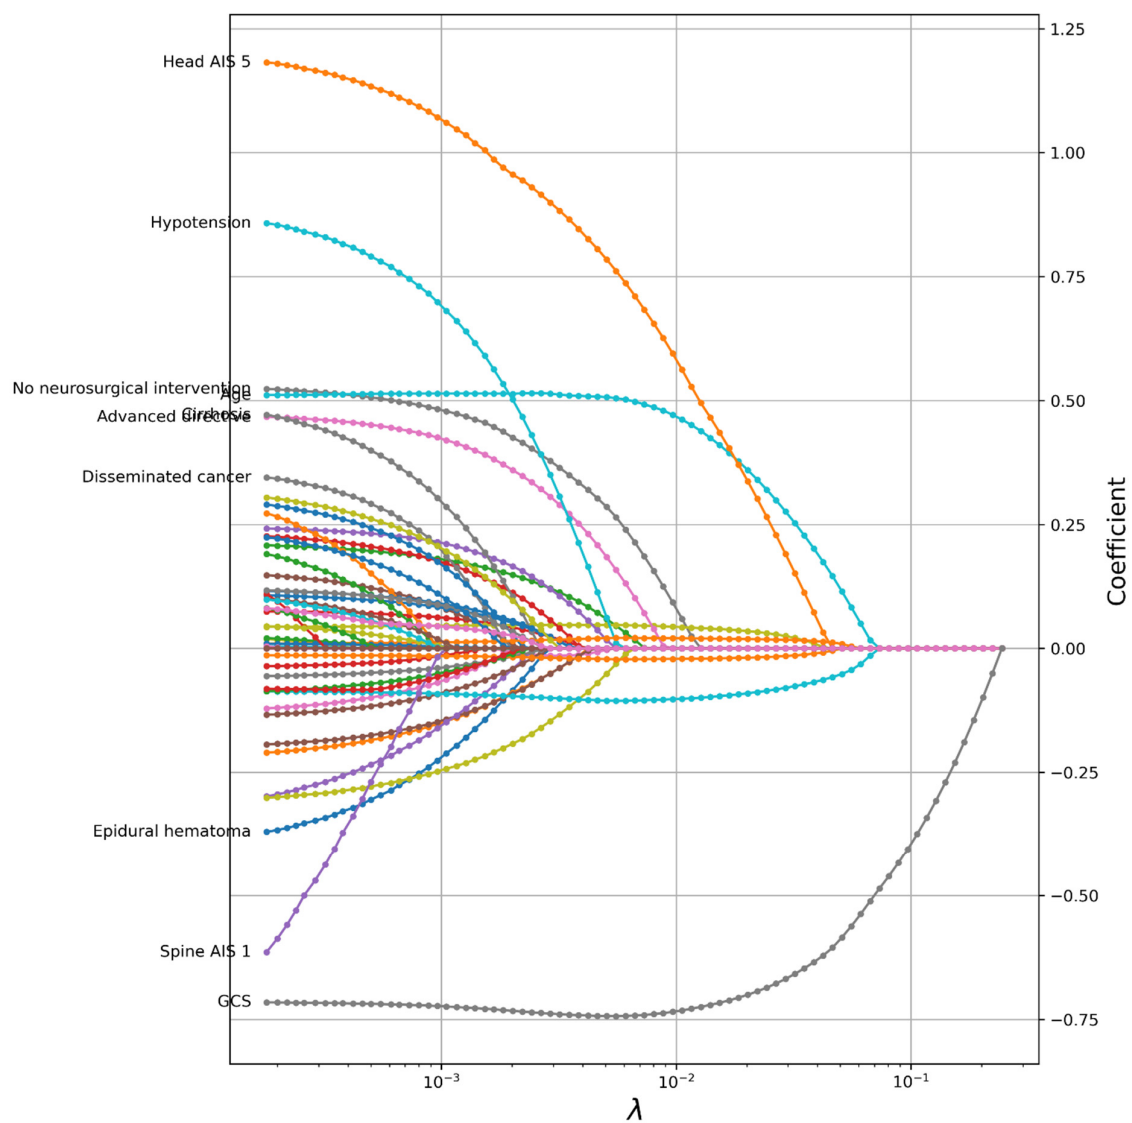

**Figure S3.** Coefficients of the predictors from the elastic net Cox regression analysis with varying both L1 and L2 penalties (top 10 predictors were labeled).

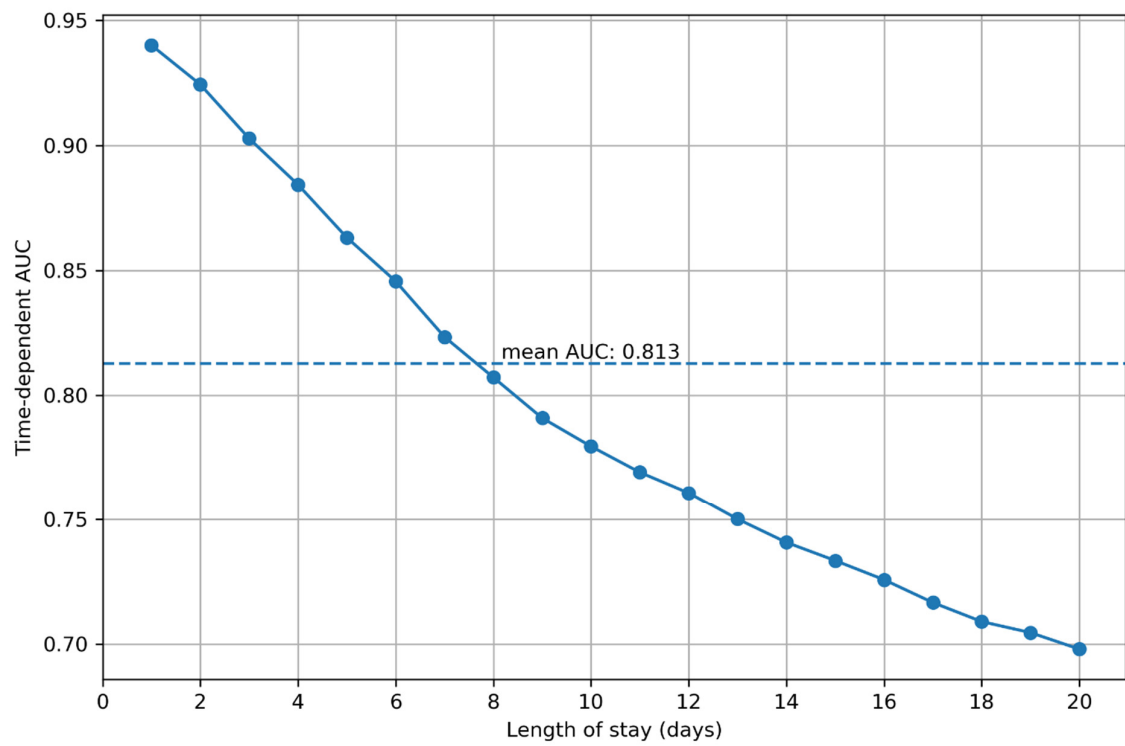

**Figure S4.** Time-dependent AUC curve of the XGBoost-powered Cox regression model for patients with a length of stay  $\leq 20$  days in the test dataset.
